# Supplementary material for: Sanitation and water supply coverage thresholds associated with active trachoma: Modeling cross-sectional data from 13 countries
Source: PubMed Central journal article supplement (PMC5800679; doi:10.1371/journal.pntd.0006110), 2018-01-22
Supplement: pntd.0006110.s016.pdf [file pntd.0006110.s016.pdf]

## Demo\_3\_RESIDENT\_v4 (eng)

| Variable Name          | Question Text                                                                                                      | Saved Value                                                                                                                                                                                                                                                                                                                                                                                                                                                                                                                      |   |                                                                             |   |                                                                                                                   |   |                                                                             |   |                                                      |   |            |
|------------------------|--------------------------------------------------------------------------------------------------------------------|----------------------------------------------------------------------------------------------------------------------------------------------------------------------------------------------------------------------------------------------------------------------------------------------------------------------------------------------------------------------------------------------------------------------------------------------------------------------------------------------------------------------------------|---|-----------------------------------------------------------------------------|---|-------------------------------------------------------------------------------------------------------------------|---|-----------------------------------------------------------------------------|---|------------------------------------------------------|---|------------|
| startTime              | Hidden from user                                                                                                   | Timestamp of form open                                                                                                                                                                                                                                                                                                                                                                                                                                                                                                           |   |                                                                             |   |                                                                                                                   |   |                                                                             |   |                                                      |   |            |
| endTime                | Hidden from user                                                                                                   | Timestamp of form save                                                                                                                                                                                                                                                                                                                                                                                                                                                                                                           |   |                                                                             |   |                                                                                                                   |   |                                                                             |   |                                                      |   |            |
| ResEU                  | EU                                                                                                                 | User entered text                                                                                                                                                                                                                                                                                                                                                                                                                                                                                                                |   |                                                                             |   |                                                                                                                   |   |                                                                             |   |                                                      |   |            |
| ResCluster             | Cluster                                                                                                            | User entered text                                                                                                                                                                                                                                                                                                                                                                                                                                                                                                                |   |                                                                             |   |                                                                                                                   |   |                                                                             |   |                                                      |   |            |
| ResHouseholdID         | Enter head of household or household ID code                                                                       | User entered text                                                                                                                                                                                                                                                                                                                                                                                                                                                                                                                |   |                                                                             |   |                                                                                                                   |   |                                                                             |   |                                                      |   |            |
| Name                   | Name                                                                                                               | User entered text                                                                                                                                                                                                                                                                                                                                                                                                                                                                                                                |   |                                                                             |   |                                                                                                                   |   |                                                                             |   |                                                      |   |            |
| Sex                    | Sex                                                                                                                | <table border="1"> <tr> <td>1</td> <td>Male</td> </tr> <tr> <td>2</td> <td>Female</td> </tr> </table>                                                                                                                                                                                                                                                                                                                                                                                                                            | 1 | Male                                                                        | 2 | Female                                                                                                            |   |                                                                             |   |                                                      |   |            |
| 1                      | Male                                                                                                               |                                                                                                                                                                                                                                                                                                                                                                                                                                                                                                                                  |   |                                                                             |   |                                                                                                                   |   |                                                                             |   |                                                      |   |            |
| 2                      | Female                                                                                                             |                                                                                                                                                                                                                                                                                                                                                                                                                                                                                                                                  |   |                                                                             |   |                                                                                                                   |   |                                                                             |   |                                                      |   |            |
| Age                    | Age (years)                                                                                                        | User entered integer                                                                                                                                                                                                                                                                                                                                                                                                                                                                                                             |   |                                                                             |   |                                                                                                                   |   |                                                                             |   |                                                      |   |            |
| Examined               | Examined?                                                                                                          | <table border="1"> <tr> <td>1</td> <td>Yes (with consent)</td> </tr> <tr> <td>2</td> <td>Absent</td> </tr> <tr> <td>3</td> <td>Refused</td> </tr> <tr> <td>4</td> <td>Other</td> </tr> </table>                                                                                                                                                                                                                                                                                                                                  | 1 | Yes (with consent)                                                          | 2 | Absent                                                                                                            | 3 | Refused                                                                     | 4 | Other                                                |   |            |
| 1                      | Yes (with consent)                                                                                                 |                                                                                                                                                                                                                                                                                                                                                                                                                                                                                                                                  |   |                                                                             |   |                                                                                                                   |   |                                                                             |   |                                                      |   |            |
| 2                      | Absent                                                                                                             |                                                                                                                                                                                                                                                                                                                                                                                                                                                                                                                                  |   |                                                                             |   |                                                                                                                   |   |                                                                             |   |                                                      |   |            |
| 3                      | Refused                                                                                                            |                                                                                                                                                                                                                                                                                                                                                                                                                                                                                                                                  |   |                                                                             |   |                                                                                                                   |   |                                                                             |   |                                                      |   |            |
| 4                      | Other                                                                                                              |                                                                                                                                                                                                                                                                                                                                                                                                                                                                                                                                  |   |                                                                             |   |                                                                                                                   |   |                                                                             |   |                                                      |   |            |
| RightEyeTT             | TT                                                                                                                 | <table border="1"> <tr> <td>0</td> <td>Sign absent</td> </tr> <tr> <td>1</td> <td>Sign present</td> </tr> <tr> <td>2</td> <td>Not able to grade</td> </tr> </table>                                                                                                                                                                                                                                                                                                                                                              | 0 | Sign absent                                                                 | 1 | Sign present                                                                                                      | 2 | Not able to grade                                                           |   |                                                      |   |            |
| 0                      | Sign absent                                                                                                        |                                                                                                                                                                                                                                                                                                                                                                                                                                                                                                                                  |   |                                                                             |   |                                                                                                                   |   |                                                                             |   |                                                      |   |            |
| 1                      | Sign present                                                                                                       |                                                                                                                                                                                                                                                                                                                                                                                                                                                                                                                                  |   |                                                                             |   |                                                                                                                   |   |                                                                             |   |                                                      |   |            |
| 2                      | Not able to grade                                                                                                  |                                                                                                                                                                                                                                                                                                                                                                                                                                                                                                                                  |   |                                                                             |   |                                                                                                                   |   |                                                                             |   |                                                      |   |            |
| OfferedSurgeryRightEye | Have you ever been offered surgery by a health worker to correct the trichiasis (in-turned eyelashes) in this eye? | <table border="1"> <tr> <td>1</td> <td>Yes, a health worker informed me and offered me surgery, and I had surgery.</td> </tr> <tr> <td>2</td> <td>Yes, a health worker informed me and offered me surgery and I accepted the offer, but I have not yet had surgery.</td> </tr> <tr> <td>3</td> <td>Yes, a health worker informed me and offered me surgery, but I declined it.</td> </tr> <tr> <td>0</td> <td>No health worker informed me and offered me surgery.</td> </tr> <tr> <td>8</td> <td>Don't know</td> </tr> </table> | 1 | Yes, a health worker informed me and offered me surgery, and I had surgery. | 2 | Yes, a health worker informed me and offered me surgery and I accepted the offer, but I have not yet had surgery. | 3 | Yes, a health worker informed me and offered me surgery, but I declined it. | 0 | No health worker informed me and offered me surgery. | 8 | Don't know |
| 1                      | Yes, a health worker informed me and offered me surgery, and I had surgery.                                        |                                                                                                                                                                                                                                                                                                                                                                                                                                                                                                                                  |   |                                                                             |   |                                                                                                                   |   |                                                                             |   |                                                      |   |            |
| 2                      | Yes, a health worker informed me and offered me surgery and I accepted the offer, but I have not yet had surgery.  |                                                                                                                                                                                                                                                                                                                                                                                                                                                                                                                                  |   |                                                                             |   |                                                                                                                   |   |                                                                             |   |                                                      |   |            |
| 3                      | Yes, a health worker informed me and offered me surgery, but I declined it.                                        |                                                                                                                                                                                                                                                                                                                                                                                                                                                                                                                                  |   |                                                                             |   |                                                                                                                   |   |                                                                             |   |                                                      |   |            |
| 0                      | No health worker informed me and offered me surgery.                                                               |                                                                                                                                                                                                                                                                                                                                                                                                                                                                                                                                  |   |                                                                             |   |                                                                                                                   |   |                                                                             |   |                                                      |   |            |
| 8                      | Don't know                                                                                                         |                                                                                                                                                                                                                                                                                                                                                                                                                                                                                                                                  |   |                                                                             |   |                                                                                                                   |   |                                                                             |   |                                                      |   |            |
| OfferedEpiRightEye     | Have you ever been offered epilation by a health workers to correct the trichiasis (in-turned eyelashes) in        | <table border="1"> <tr> <td>0</td> <td>No</td> </tr> </table>                                                                                                                                                                                                                                                                                                                                                                                                                                                                    | 0 | No                                                                          |   |                                                                                                                   |   |                                                                             |   |                                                      |   |            |
| 0                      | No                                                                                                                 |                                                                                                                                                                                                                                                                                                                                                                                                                                                                                                                                  |   |                                                                             |   |                                                                                                                   |   |                                                                             |   |                                                      |   |            |

|                       |                                                                                                                       |   |                                                                                                                   |
|-----------------------|-----------------------------------------------------------------------------------------------------------------------|---|-------------------------------------------------------------------------------------------------------------------|
|                       | this eye?                                                                                                             | 1 | Yes                                                                                                               |
|                       |                                                                                                                       | 8 | Don't know                                                                                                        |
| ScarringRightEye      | Does this eye show TS?                                                                                                | 0 | Sign absent                                                                                                       |
|                       |                                                                                                                       | 1 | Sign present                                                                                                      |
|                       |                                                                                                                       | 2 | Unable to evert the eyelid                                                                                        |
| RightEyeTF            | TF                                                                                                                    | 0 | Sign absent                                                                                                       |
|                       |                                                                                                                       | 1 | Sign present                                                                                                      |
|                       |                                                                                                                       | 2 | Not able to grade                                                                                                 |
| RightEyeTI            | TI                                                                                                                    | 0 | Sign absent                                                                                                       |
|                       |                                                                                                                       | 1 | Sign present                                                                                                      |
|                       |                                                                                                                       | 2 | Not able to grade                                                                                                 |
| LeftEyeTT             | TT                                                                                                                    | 0 | Sign absent                                                                                                       |
|                       |                                                                                                                       | 1 | Sign present                                                                                                      |
|                       |                                                                                                                       | 2 | Not able to grade                                                                                                 |
| OfferedSurgeryLeftEye | Have you ever been offered surgery by a health worker to correct the trichiasis (in-turned eyelashes) in this eye?    | 1 | Yes, a health worker informed me and offered me surgery, and I had surgery.                                       |
|                       |                                                                                                                       | 2 | Yes, a health worker informed me and offered me surgery and I accepted the offer, but I have not yet had surgery. |
|                       |                                                                                                                       | 3 | Yes, a health worker informed me and offered me surgery, but I declined it.                                       |
|                       |                                                                                                                       | 0 | No health worker informed me and offered me surgery.                                                              |
|                       |                                                                                                                       | 8 | Don't know                                                                                                        |
| OfferedEpiLeftEye     | Have you ever been offered epilation by a health workers to correct the trichiasis (in-turned eyelashes) in this eye? | 0 | No                                                                                                                |
|                       |                                                                                                                       | 1 | Yes                                                                                                               |
|                       |                                                                                                                       | 8 | Don't know                                                                                                        |

|                 |                        |                   |                            |
|-----------------|------------------------|-------------------|----------------------------|
| ScarringLeftEye | Does this eye show TS? | 0                 | Sign absent                |
|                 |                        | 1                 | Sign present               |
|                 |                        | 2                 | Unable to evert the eyelid |
| LeftEyeTF       | TF                     | 0                 | Sign absent                |
|                 |                        | 1                 | Sign present               |
|                 |                        | 2                 | Not able to grade          |
| LeftEyeTI       | TI                     | 0                 | Sign absent                |
|                 |                        | 1                 | Sign present               |
|                 |                        | 2                 | Not able to grade          |
| ResNotes        | Additional notes?      | User entered text |                            |
| meta            | Hidden from user       |                   |                            |
| instanceID      | Hidden from user       |                   |                            |
