# Supplementary material for: Sanitation and water supply coverage thresholds associated with active trachoma: Modeling cross-sectional data from 13 countries
Source: PubMed Central journal article supplement (PMC5800679; doi:10.1371/journal.pntd.0006110), 2018-01-22
Supplement: pntd.0006110.s017.pdf [file pntd.0006110.s017.pdf]

## Demo\_2\_HOUSEHOLD\_v3 (eng)

| Variable Name        | Question Text                                                                                 | Saved Value                                                                                                                                                                                                                                                                                                                                                                                                                                                                                                                                                                                                                                                |   |                           |   |                            |   |                               |   |                   |   |                    |   |                      |   |                  |   |                    |   |                      |    |              |    |                                              |    |                      |
|----------------------|-----------------------------------------------------------------------------------------------|------------------------------------------------------------------------------------------------------------------------------------------------------------------------------------------------------------------------------------------------------------------------------------------------------------------------------------------------------------------------------------------------------------------------------------------------------------------------------------------------------------------------------------------------------------------------------------------------------------------------------------------------------------|---|---------------------------|---|----------------------------|---|-------------------------------|---|-------------------|---|--------------------|---|----------------------|---|------------------|---|--------------------|---|----------------------|----|--------------|----|----------------------------------------------|----|----------------------|
| startTime            | Hidden from user                                                                              | Timestamp of form open                                                                                                                                                                                                                                                                                                                                                                                                                                                                                                                                                                                                                                     |   |                           |   |                            |   |                               |   |                   |   |                    |   |                      |   |                  |   |                    |   |                      |    |              |    |                                              |    |                      |
| endTime              | Hidden from user                                                                              | Timestamp of form save                                                                                                                                                                                                                                                                                                                                                                                                                                                                                                                                                                                                                                     |   |                           |   |                            |   |                               |   |                   |   |                    |   |                      |   |                  |   |                    |   |                      |    |              |    |                                              |    |                      |
| GPS                  | Capture GPS data                                                                              | User captured location coordinates                                                                                                                                                                                                                                                                                                                                                                                                                                                                                                                                                                                                                         |   |                           |   |                            |   |                               |   |                   |   |                    |   |                      |   |                  |   |                    |   |                      |    |              |    |                                              |    |                      |
| HouseholdInterviewer | Recorder ID (4 numbers)                                                                       | User entered text                                                                                                                                                                                                                                                                                                                                                                                                                                                                                                                                                                                                                                          |   |                           |   |                            |   |                               |   |                   |   |                    |   |                      |   |                  |   |                    |   |                      |    |              |    |                                              |    |                      |
| HouseholdEU          | EU                                                                                            | User entered text                                                                                                                                                                                                                                                                                                                                                                                                                                                                                                                                                                                                                                          |   |                           |   |                            |   |                               |   |                   |   |                    |   |                      |   |                  |   |                    |   |                      |    |              |    |                                              |    |                      |
| HouseholdCluster     | Cluster                                                                                       | User entered text                                                                                                                                                                                                                                                                                                                                                                                                                                                                                                                                                                                                                                          |   |                           |   |                            |   |                               |   |                   |   |                    |   |                      |   |                  |   |                    |   |                      |    |              |    |                                              |    |                      |
| HouseholdID          | Enter head of household or household ID code                                                  | User entered text                                                                                                                                                                                                                                                                                                                                                                                                                                                                                                                                                                                                                                          |   |                           |   |                            |   |                               |   |                   |   |                    |   |                      |   |                  |   |                    |   |                      |    |              |    |                                              |    |                      |
| W1DrinkSource        | In the dry season, what is the main source of drinking-water for members of your household?   | <table border="1"> <tr><td>1</td><td>Piped water into dwelling</td></tr> <tr><td>2</td><td>Piped water into yard/plot</td></tr> <tr><td>3</td><td>Public tap/standpipe</td></tr> <tr><td>4</td><td>Tubewell/borehole</td></tr> <tr><td>5</td><td>Protected dug well</td></tr> <tr><td>6</td><td>Unprotected dug well</td></tr> <tr><td>7</td><td>Protected spring</td></tr> <tr><td>8</td><td>Unprotected spring</td></tr> <tr><td>9</td><td>Rainwater collection</td></tr> <tr><td>10</td><td>Water vendor</td></tr> <tr><td>11</td><td>Surface water (e.g. river, dam, lake, canal)</td></tr> <tr><td>99</td><td>Other (specify next)</td></tr> </table> | 1 | Piped water into dwelling | 2 | Piped water into yard/plot | 3 | Public tap/standpipe          | 4 | Tubewell/borehole | 5 | Protected dug well | 6 | Unprotected dug well | 7 | Protected spring | 8 | Unprotected spring | 9 | Rainwater collection | 10 | Water vendor | 11 | Surface water (e.g. river, dam, lake, canal) | 99 | Other (specify next) |
| 1                    | Piped water into dwelling                                                                     |                                                                                                                                                                                                                                                                                                                                                                                                                                                                                                                                                                                                                                                            |   |                           |   |                            |   |                               |   |                   |   |                    |   |                      |   |                  |   |                    |   |                      |    |              |    |                                              |    |                      |
| 2                    | Piped water into yard/plot                                                                    |                                                                                                                                                                                                                                                                                                                                                                                                                                                                                                                                                                                                                                                            |   |                           |   |                            |   |                               |   |                   |   |                    |   |                      |   |                  |   |                    |   |                      |    |              |    |                                              |    |                      |
| 3                    | Public tap/standpipe                                                                          |                                                                                                                                                                                                                                                                                                                                                                                                                                                                                                                                                                                                                                                            |   |                           |   |                            |   |                               |   |                   |   |                    |   |                      |   |                  |   |                    |   |                      |    |              |    |                                              |    |                      |
| 4                    | Tubewell/borehole                                                                             |                                                                                                                                                                                                                                                                                                                                                                                                                                                                                                                                                                                                                                                            |   |                           |   |                            |   |                               |   |                   |   |                    |   |                      |   |                  |   |                    |   |                      |    |              |    |                                              |    |                      |
| 5                    | Protected dug well                                                                            |                                                                                                                                                                                                                                                                                                                                                                                                                                                                                                                                                                                                                                                            |   |                           |   |                            |   |                               |   |                   |   |                    |   |                      |   |                  |   |                    |   |                      |    |              |    |                                              |    |                      |
| 6                    | Unprotected dug well                                                                          |                                                                                                                                                                                                                                                                                                                                                                                                                                                                                                                                                                                                                                                            |   |                           |   |                            |   |                               |   |                   |   |                    |   |                      |   |                  |   |                    |   |                      |    |              |    |                                              |    |                      |
| 7                    | Protected spring                                                                              |                                                                                                                                                                                                                                                                                                                                                                                                                                                                                                                                                                                                                                                            |   |                           |   |                            |   |                               |   |                   |   |                    |   |                      |   |                  |   |                    |   |                      |    |              |    |                                              |    |                      |
| 8                    | Unprotected spring                                                                            |                                                                                                                                                                                                                                                                                                                                                                                                                                                                                                                                                                                                                                                            |   |                           |   |                            |   |                               |   |                   |   |                    |   |                      |   |                  |   |                    |   |                      |    |              |    |                                              |    |                      |
| 9                    | Rainwater collection                                                                          |                                                                                                                                                                                                                                                                                                                                                                                                                                                                                                                                                                                                                                                            |   |                           |   |                            |   |                               |   |                   |   |                    |   |                      |   |                  |   |                    |   |                      |    |              |    |                                              |    |                      |
| 10                   | Water vendor                                                                                  |                                                                                                                                                                                                                                                                                                                                                                                                                                                                                                                                                                                                                                                            |   |                           |   |                            |   |                               |   |                   |   |                    |   |                      |   |                  |   |                    |   |                      |    |              |    |                                              |    |                      |
| 11                   | Surface water (e.g. river, dam, lake, canal)                                                  |                                                                                                                                                                                                                                                                                                                                                                                                                                                                                                                                                                                                                                                            |   |                           |   |                            |   |                               |   |                   |   |                    |   |                      |   |                  |   |                    |   |                      |    |              |    |                                              |    |                      |
| 99                   | Other (specify next)                                                                          |                                                                                                                                                                                                                                                                                                                                                                                                                                                                                                                                                                                                                                                            |   |                           |   |                            |   |                               |   |                   |   |                    |   |                      |   |                  |   |                    |   |                      |    |              |    |                                              |    |                      |
| W1DrinkSourceSpecify | Specify                                                                                       | User entered text                                                                                                                                                                                                                                                                                                                                                                                                                                                                                                                                                                                                                                          |   |                           |   |                            |   |                               |   |                   |   |                    |   |                      |   |                  |   |                    |   |                      |    |              |    |                                              |    |                      |
| W2GetDrinkWater      | How long does it take to go there, get water, and come back?                                  | <table border="1"> <tr><td>1</td><td>Water source in the yard</td></tr> <tr><td>2</td><td>Less than 30 minutes</td></tr> <tr><td>3</td><td>Between 30 minutes and 1 hour</td></tr> <tr><td>4</td><td>More than 1 hour</td></tr> </table>                                                                                                                                                                                                                                                                                                                                                                                                                   | 1 | Water source in the yard  | 2 | Less than 30 minutes       | 3 | Between 30 minutes and 1 hour | 4 | More than 1 hour  |   |                    |   |                      |   |                  |   |                    |   |                      |    |              |    |                                              |    |                      |
| 1                    | Water source in the yard                                                                      |                                                                                                                                                                                                                                                                                                                                                                                                                                                                                                                                                                                                                                                            |   |                           |   |                            |   |                               |   |                   |   |                    |   |                      |   |                  |   |                    |   |                      |    |              |    |                                              |    |                      |
| 2                    | Less than 30 minutes                                                                          |                                                                                                                                                                                                                                                                                                                                                                                                                                                                                                                                                                                                                                                            |   |                           |   |                            |   |                               |   |                   |   |                    |   |                      |   |                  |   |                    |   |                      |    |              |    |                                              |    |                      |
| 3                    | Between 30 minutes and 1 hour                                                                 |                                                                                                                                                                                                                                                                                                                                                                                                                                                                                                                                                                                                                                                            |   |                           |   |                            |   |                               |   |                   |   |                    |   |                      |   |                  |   |                    |   |                      |    |              |    |                                              |    |                      |
| 4                    | More than 1 hour                                                                              |                                                                                                                                                                                                                                                                                                                                                                                                                                                                                                                                                                                                                                                            |   |                           |   |                            |   |                               |   |                   |   |                    |   |                      |   |                  |   |                    |   |                      |    |              |    |                                              |    |                      |
| W3WashWater          | In the dry season, what is the main source of water used by your household for washing faces? | <table border="1"> <tr><td>1</td><td>Piped water into dwelling</td></tr> <tr><td>2</td><td>Piped water into yard/pot</td></tr> <tr><td>3</td><td>Public tap/standpipe</td></tr> </table>                                                                                                                                                                                                                                                                                                                                                                                                                                                                   | 1 | Piped water into dwelling | 2 | Piped water into yard/pot  | 3 | Public tap/standpipe          |   |                   |   |                    |   |                      |   |                  |   |                    |   |                      |    |              |    |                                              |    |                      |
| 1                    | Piped water into dwelling                                                                     |                                                                                                                                                                                                                                                                                                                                                                                                                                                                                                                                                                                                                                                            |   |                           |   |                            |   |                               |   |                   |   |                    |   |                      |   |                  |   |                    |   |                      |    |              |    |                                              |    |                      |
| 2                    | Piped water into yard/pot                                                                     |                                                                                                                                                                                                                                                                                                                                                                                                                                                                                                                                                                                                                                                            |   |                           |   |                            |   |                               |   |                   |   |                    |   |                      |   |                  |   |                    |   |                      |    |              |    |                                              |    |                      |
| 3                    | Public tap/standpipe                                                                          |                                                                                                                                                                                                                                                                                                                                                                                                                                                                                                                                                                                                                                                            |   |                           |   |                            |   |                               |   |                   |   |                    |   |                      |   |                  |   |                    |   |                      |    |              |    |                                              |    |                      |

|                     |                                                                                                                       |                                                                                                                                                                                                                                                                                                                                                                                                                                                                                              |   |                                           |   |                                 |   |                                      |   |                                    |   |                    |   |                      |    |              |    |                                              |    |                      |
|---------------------|-----------------------------------------------------------------------------------------------------------------------|----------------------------------------------------------------------------------------------------------------------------------------------------------------------------------------------------------------------------------------------------------------------------------------------------------------------------------------------------------------------------------------------------------------------------------------------------------------------------------------------|---|-------------------------------------------|---|---------------------------------|---|--------------------------------------|---|------------------------------------|---|--------------------|---|----------------------|----|--------------|----|----------------------------------------------|----|----------------------|
|                     |                                                                                                                       | <table border="1"> <tr><td>4</td><td>Tubewell/borehole</td></tr> <tr><td>5</td><td>Protected dug well</td></tr> <tr><td>6</td><td>Unprotected dug well</td></tr> <tr><td>7</td><td>Protected spring</td></tr> <tr><td>8</td><td>Unprotected spring</td></tr> <tr><td>9</td><td>Rainwater collection</td></tr> <tr><td>10</td><td>Water vendor</td></tr> <tr><td>11</td><td>Surface water (e.g. river, dam, lake, canal)</td></tr> <tr><td>99</td><td>Other (specify next)</td></tr> </table> | 4 | Tubewell/borehole                         | 5 | Protected dug well              | 6 | Unprotected dug well                 | 7 | Protected spring                   | 8 | Unprotected spring | 9 | Rainwater collection | 10 | Water vendor | 11 | Surface water (e.g. river, dam, lake, canal) | 99 | Other (specify next) |
| 4                   | Tubewell/borehole                                                                                                     |                                                                                                                                                                                                                                                                                                                                                                                                                                                                                              |   |                                           |   |                                 |   |                                      |   |                                    |   |                    |   |                      |    |              |    |                                              |    |                      |
| 5                   | Protected dug well                                                                                                    |                                                                                                                                                                                                                                                                                                                                                                                                                                                                                              |   |                                           |   |                                 |   |                                      |   |                                    |   |                    |   |                      |    |              |    |                                              |    |                      |
| 6                   | Unprotected dug well                                                                                                  |                                                                                                                                                                                                                                                                                                                                                                                                                                                                                              |   |                                           |   |                                 |   |                                      |   |                                    |   |                    |   |                      |    |              |    |                                              |    |                      |
| 7                   | Protected spring                                                                                                      |                                                                                                                                                                                                                                                                                                                                                                                                                                                                                              |   |                                           |   |                                 |   |                                      |   |                                    |   |                    |   |                      |    |              |    |                                              |    |                      |
| 8                   | Unprotected spring                                                                                                    |                                                                                                                                                                                                                                                                                                                                                                                                                                                                                              |   |                                           |   |                                 |   |                                      |   |                                    |   |                    |   |                      |    |              |    |                                              |    |                      |
| 9                   | Rainwater collection                                                                                                  |                                                                                                                                                                                                                                                                                                                                                                                                                                                                                              |   |                                           |   |                                 |   |                                      |   |                                    |   |                    |   |                      |    |              |    |                                              |    |                      |
| 10                  | Water vendor                                                                                                          |                                                                                                                                                                                                                                                                                                                                                                                                                                                                                              |   |                                           |   |                                 |   |                                      |   |                                    |   |                    |   |                      |    |              |    |                                              |    |                      |
| 11                  | Surface water (e.g. river, dam, lake, canal)                                                                          |                                                                                                                                                                                                                                                                                                                                                                                                                                                                                              |   |                                           |   |                                 |   |                                      |   |                                    |   |                    |   |                      |    |              |    |                                              |    |                      |
| 99                  | Other (specify next)                                                                                                  |                                                                                                                                                                                                                                                                                                                                                                                                                                                                                              |   |                                           |   |                                 |   |                                      |   |                                    |   |                    |   |                      |    |              |    |                                              |    |                      |
| W3WashSourceSpecify | Specify                                                                                                               | User entered text                                                                                                                                                                                                                                                                                                                                                                                                                                                                            |   |                                           |   |                                 |   |                                      |   |                                    |   |                    |   |                      |    |              |    |                                              |    |                      |
| W4GetWashWater      | If you collected water there to bring back to the house, how long does it take to go there, get water, and come back? | <table border="1"> <tr><td>0</td><td>All face washing done at the water source</td></tr> <tr><td>1</td><td>Water source in the yard</td></tr> <tr><td>2</td><td>Less than 30 minutes</td></tr> <tr><td>3</td><td>Between 30 minutes and 1 hour</td></tr> <tr><td>4</td><td>More than 1 hour</td></tr> </table>                                                                                                                                                                               | 0 | All face washing done at the water source | 1 | Water source in the yard        | 2 | Less than 30 minutes                 | 3 | Between 30 minutes and 1 hour      | 4 | More than 1 hour   |   |                      |    |              |    |                                              |    |                      |
| 0                   | All face washing done at the water source                                                                             |                                                                                                                                                                                                                                                                                                                                                                                                                                                                                              |   |                                           |   |                                 |   |                                      |   |                                    |   |                    |   |                      |    |              |    |                                              |    |                      |
| 1                   | Water source in the yard                                                                                              |                                                                                                                                                                                                                                                                                                                                                                                                                                                                                              |   |                                           |   |                                 |   |                                      |   |                                    |   |                    |   |                      |    |              |    |                                              |    |                      |
| 2                   | Less than 30 minutes                                                                                                  |                                                                                                                                                                                                                                                                                                                                                                                                                                                                                              |   |                                           |   |                                 |   |                                      |   |                                    |   |                    |   |                      |    |              |    |                                              |    |                      |
| 3                   | Between 30 minutes and 1 hour                                                                                         |                                                                                                                                                                                                                                                                                                                                                                                                                                                                                              |   |                                           |   |                                 |   |                                      |   |                                    |   |                    |   |                      |    |              |    |                                              |    |                      |
| 4                   | More than 1 hour                                                                                                      |                                                                                                                                                                                                                                                                                                                                                                                                                                                                                              |   |                                           |   |                                 |   |                                      |   |                                    |   |                    |   |                      |    |              |    |                                              |    |                      |
| S1Defecate          | Where do you and other adults in the household usually defecate?                                                      | <table border="1"> <tr><td>1</td><td>Shared latrine</td></tr> <tr><td>2</td><td>Private latrine</td></tr> <tr><td>3</td><td>No structure, outside near the house</td></tr> <tr><td>4</td><td>No structure, in the bush or field</td></tr> <tr><td>9</td><td>Other</td></tr> </table>                                                                                                                                                                                                         | 1 | Shared latrine                            | 2 | Private latrine                 | 3 | No structure, outside near the house | 4 | No structure, in the bush or field | 9 | Other              |   |                      |    |              |    |                                              |    |                      |
| 1                   | Shared latrine                                                                                                        |                                                                                                                                                                                                                                                                                                                                                                                                                                                                                              |   |                                           |   |                                 |   |                                      |   |                                    |   |                    |   |                      |    |              |    |                                              |    |                      |
| 2                   | Private latrine                                                                                                       |                                                                                                                                                                                                                                                                                                                                                                                                                                                                                              |   |                                           |   |                                 |   |                                      |   |                                    |   |                    |   |                      |    |              |    |                                              |    |                      |
| 3                   | No structure, outside near the house                                                                                  |                                                                                                                                                                                                                                                                                                                                                                                                                                                                                              |   |                                           |   |                                 |   |                                      |   |                                    |   |                    |   |                      |    |              |    |                                              |    |                      |
| 4                   | No structure, in the bush or field                                                                                    |                                                                                                                                                                                                                                                                                                                                                                                                                                                                                              |   |                                           |   |                                 |   |                                      |   |                                    |   |                    |   |                      |    |              |    |                                              |    |                      |
| 9                   | Other                                                                                                                 |                                                                                                                                                                                                                                                                                                                                                                                                                                                                                              |   |                                           |   |                                 |   |                                      |   |                                    |   |                    |   |                      |    |              |    |                                              |    |                      |
| S2SeeLatrine        | Observation: Ask to see the latrine/toilet                                                                            | <table border="1"> <tr><td>1</td><td>Flush/pour flush to piped sewer system</td></tr> <tr><td>2</td><td>Flush/pour flush to septic tank</td></tr> <tr><td>3</td><td>Flush/pour flush to pit latrine</td></tr> <tr><td>4</td><td>Flush/pour flush to open</td></tr> </table>                                                                                                                                                                                                                  | 1 | Flush/pour flush to piped sewer system    | 2 | Flush/pour flush to septic tank | 3 | Flush/pour flush to pit latrine      | 4 | Flush/pour flush to open           |   |                    |   |                      |    |              |    |                                              |    |                      |
| 1                   | Flush/pour flush to piped sewer system                                                                                |                                                                                                                                                                                                                                                                                                                                                                                                                                                                                              |   |                                           |   |                                 |   |                                      |   |                                    |   |                    |   |                      |    |              |    |                                              |    |                      |
| 2                   | Flush/pour flush to septic tank                                                                                       |                                                                                                                                                                                                                                                                                                                                                                                                                                                                                              |   |                                           |   |                                 |   |                                      |   |                                    |   |                    |   |                      |    |              |    |                                              |    |                      |
| 3                   | Flush/pour flush to pit latrine                                                                                       |                                                                                                                                                                                                                                                                                                                                                                                                                                                                                              |   |                                           |   |                                 |   |                                      |   |                                    |   |                    |   |                      |    |              |    |                                              |    |                      |
| 4                   | Flush/pour flush to open                                                                                              |                                                                                                                                                                                                                                                                                                                                                                                                                                                                                              |   |                                           |   |                                 |   |                                      |   |                                    |   |                    |   |                      |    |              |    |                                              |    |                      |

|                     |                                       |                                                                                                                                                                                                                                                                                                                                                                                                                                                                                                                                                                           |   |        |   |                                   |   |                                       |   |                       |   |                                   |   |                   |    |        |    |                                |    |                                |    |                      |
|---------------------|---------------------------------------|---------------------------------------------------------------------------------------------------------------------------------------------------------------------------------------------------------------------------------------------------------------------------------------------------------------------------------------------------------------------------------------------------------------------------------------------------------------------------------------------------------------------------------------------------------------------------|---|--------|---|-----------------------------------|---|---------------------------------------|---|-----------------------|---|-----------------------------------|---|-------------------|----|--------|----|--------------------------------|----|--------------------------------|----|----------------------|
|                     |                                       | <table border="1"> <tr><td></td><td>drains</td></tr> <tr><td>5</td><td>Flush/pour flush to unknown place</td></tr> <tr><td>6</td><td>Ventilated improved pit latrine (VIP)</td></tr> <tr><td>7</td><td>Pit latrine with slab</td></tr> <tr><td>8</td><td>Pit latrine without slab/open pit</td></tr> <tr><td>9</td><td>Composting toilet</td></tr> <tr><td>10</td><td>Bucket</td></tr> <tr><td>11</td><td>Hanging toilet/hanging latrine</td></tr> <tr><td>12</td><td>No facilities or bush or field</td></tr> <tr><td>99</td><td>Other (specify next)</td></tr> </table> |   | drains | 5 | Flush/pour flush to unknown place | 6 | Ventilated improved pit latrine (VIP) | 7 | Pit latrine with slab | 8 | Pit latrine without slab/open pit | 9 | Composting toilet | 10 | Bucket | 11 | Hanging toilet/hanging latrine | 12 | No facilities or bush or field | 99 | Other (specify next) |
|                     | drains                                |                                                                                                                                                                                                                                                                                                                                                                                                                                                                                                                                                                           |   |        |   |                                   |   |                                       |   |                       |   |                                   |   |                   |    |        |    |                                |    |                                |    |                      |
| 5                   | Flush/pour flush to unknown place     |                                                                                                                                                                                                                                                                                                                                                                                                                                                                                                                                                                           |   |        |   |                                   |   |                                       |   |                       |   |                                   |   |                   |    |        |    |                                |    |                                |    |                      |
| 6                   | Ventilated improved pit latrine (VIP) |                                                                                                                                                                                                                                                                                                                                                                                                                                                                                                                                                                           |   |        |   |                                   |   |                                       |   |                       |   |                                   |   |                   |    |        |    |                                |    |                                |    |                      |
| 7                   | Pit latrine with slab                 |                                                                                                                                                                                                                                                                                                                                                                                                                                                                                                                                                                           |   |        |   |                                   |   |                                       |   |                       |   |                                   |   |                   |    |        |    |                                |    |                                |    |                      |
| 8                   | Pit latrine without slab/open pit     |                                                                                                                                                                                                                                                                                                                                                                                                                                                                                                                                                                           |   |        |   |                                   |   |                                       |   |                       |   |                                   |   |                   |    |        |    |                                |    |                                |    |                      |
| 9                   | Composting toilet                     |                                                                                                                                                                                                                                                                                                                                                                                                                                                                                                                                                                           |   |        |   |                                   |   |                                       |   |                       |   |                                   |   |                   |    |        |    |                                |    |                                |    |                      |
| 10                  | Bucket                                |                                                                                                                                                                                                                                                                                                                                                                                                                                                                                                                                                                           |   |        |   |                                   |   |                                       |   |                       |   |                                   |   |                   |    |        |    |                                |    |                                |    |                      |
| 11                  | Hanging toilet/hanging latrine        |                                                                                                                                                                                                                                                                                                                                                                                                                                                                                                                                                                           |   |        |   |                                   |   |                                       |   |                       |   |                                   |   |                   |    |        |    |                                |    |                                |    |                      |
| 12                  | No facilities or bush or field        |                                                                                                                                                                                                                                                                                                                                                                                                                                                                                                                                                                           |   |        |   |                                   |   |                                       |   |                       |   |                                   |   |                   |    |        |    |                                |    |                                |    |                      |
| 99                  | Other (specify next)                  |                                                                                                                                                                                                                                                                                                                                                                                                                                                                                                                                                                           |   |        |   |                                   |   |                                       |   |                       |   |                                   |   |                   |    |        |    |                                |    |                                |    |                      |
| S2SeeLatrineSpecify | Specify                               | User entered text                                                                                                                                                                                                                                                                                                                                                                                                                                                                                                                                                         |   |        |   |                                   |   |                                       |   |                       |   |                                   |   |                   |    |        |    |                                |    |                                |    |                      |
| H1Distance          | Observation                           | <table border="1"> <tr><td>0</td><td>No</td></tr> <tr><td>1</td><td>Yes</td></tr> <tr><td>5</td><td>Not applicable (no latrine/toilet)</td></tr> </table>                                                                                                                                                                                                                                                                                                                                                                                                                 | 0 | No     | 1 | Yes                               | 5 | Not applicable (no latrine/toilet)    |   |                       |   |                                   |   |                   |    |        |    |                                |    |                                |    |                      |
| 0                   | No                                    |                                                                                                                                                                                                                                                                                                                                                                                                                                                                                                                                                                           |   |        |   |                                   |   |                                       |   |                       |   |                                   |   |                   |    |        |    |                                |    |                                |    |                      |
| 1                   | Yes                                   |                                                                                                                                                                                                                                                                                                                                                                                                                                                                                                                                                                           |   |        |   |                                   |   |                                       |   |                       |   |                                   |   |                   |    |        |    |                                |    |                                |    |                      |
| 5                   | Not applicable (no latrine/toilet)    |                                                                                                                                                                                                                                                                                                                                                                                                                                                                                                                                                                           |   |        |   |                                   |   |                                       |   |                       |   |                                   |   |                   |    |        |    |                                |    |                                |    |                      |
| H2Water             | Observation                           | <table border="1"> <tr><td>0</td><td>No</td></tr> <tr><td>1</td><td>Yes</td></tr> <tr><td>5</td><td>Not applicable (no latrine/toilet)</td></tr> </table>                                                                                                                                                                                                                                                                                                                                                                                                                 | 0 | No     | 1 | Yes                               | 5 | Not applicable (no latrine/toilet)    |   |                       |   |                                   |   |                   |    |        |    |                                |    |                                |    |                      |
| 0                   | No                                    |                                                                                                                                                                                                                                                                                                                                                                                                                                                                                                                                                                           |   |        |   |                                   |   |                                       |   |                       |   |                                   |   |                   |    |        |    |                                |    |                                |    |                      |
| 1                   | Yes                                   |                                                                                                                                                                                                                                                                                                                                                                                                                                                                                                                                                                           |   |        |   |                                   |   |                                       |   |                       |   |                                   |   |                   |    |        |    |                                |    |                                |    |                      |
| 5                   | Not applicable (no latrine/toilet)    |                                                                                                                                                                                                                                                                                                                                                                                                                                                                                                                                                                           |   |        |   |                                   |   |                                       |   |                       |   |                                   |   |                   |    |        |    |                                |    |                                |    |                      |
| H3Soap              | Observation                           | <table border="1"> <tr><td>0</td><td>No</td></tr> <tr><td>1</td><td>Yes</td></tr> <tr><td>5</td><td>Not applicable (no latrine/toilet)</td></tr> </table>                                                                                                                                                                                                                                                                                                                                                                                                                 | 0 | No     | 1 | Yes                               | 5 | Not applicable (no latrine/toilet)    |   |                       |   |                                   |   |                   |    |        |    |                                |    |                                |    |                      |
| 0                   | No                                    |                                                                                                                                                                                                                                                                                                                                                                                                                                                                                                                                                                           |   |        |   |                                   |   |                                       |   |                       |   |                                   |   |                   |    |        |    |                                |    |                                |    |                      |
| 1                   | Yes                                   |                                                                                                                                                                                                                                                                                                                                                                                                                                                                                                                                                                           |   |        |   |                                   |   |                                       |   |                       |   |                                   |   |                   |    |        |    |                                |    |                                |    |                      |
| 5                   | Not applicable (no latrine/toilet)    |                                                                                                                                                                                                                                                                                                                                                                                                                                                                                                                                                                           |   |        |   |                                   |   |                                       |   |                       |   |                                   |   |                   |    |        |    |                                |    |                                |    |                      |
| meta                | Hidden from user                      |                                                                                                                                                                                                                                                                                                                                                                                                                                                                                                                                                                           |   |        |   |                                   |   |                                       |   |                       |   |                                   |   |                   |    |        |    |                                |    |                                |    |                      |
| instanceID          | Hidden from user                      |                                                                                                                                                                                                                                                                                                                                                                                                                                                                                                                                                                           |   |        |   |                                   |   |                                       |   |                       |   |                                   |   |                   |    |        |    |                                |    |                                |    |                      |
