# Supplementary material for: Sanitation and water supply coverage thresholds associated with active trachoma: Modeling cross-sectional data from 13 countries
Source: PubMed Central journal article supplement (PMC5800679; doi:10.1371/journal.pntd.0006110), 2018-01-22
Supplement: pntd.0006110.s018.pdf [file pntd.0006110.s018.pdf]

### Supplemental text S3.

Researchers are welcome to request access to the de-identified datasets, through the contacts below:

|                 |                                                                                                         |
|-----------------|---------------------------------------------------------------------------------------------------------|
| Côte d'Ivoire   | Kouakou Ilunga Marie Madeleine <a href="mailto:magdy_koua@yahoo.fr">magdy_koua@yahoo.fr</a>             |
| Egypt           | Khaled Amer <a href="mailto:amerk888@gmail.com">amerk888@gmail.com</a>                                  |
| Guinea          | André Goepogui <a href="mailto:agoep@yahoo.fr">agoep@yahoo.fr</a>                                       |
| Malawi          | Khumbo Kalua <a href="mailto:khumbokalua@yahoo.com">khumbokalua@yahoo.com</a>                           |
| Yemen           | Tawfik Al-Khatib <a href="mailto:tawfik234@yahoo.com">tawfik234@yahoo.com</a>                           |
| Nigeria         | Nicholas Olobio <a href="mailto:olobio@yahoo.com">olobio@yahoo.com</a>                                  |
| Ethiopia        | Biruck Kebede <a href="mailto:biruck1@gmail.com">biruck1@gmail.com</a>                                  |
| Lao PDR         | Khamphoua Southisombath <a href="mailto:southi1961@gmail.com">southi1961@gmail.com</a>                  |
| Solomon Islands | Oliver Sokana <a href="mailto:osokana@moh.gov.sb">osokana@moh.gov.sb</a>                                |
| DRC             | Jean Ndjemba <a href="mailto:drndjemba@yahoo.fr">drndjemba@yahoo.fr</a>                                 |
| Mozambique      | Mariamo Saide Abdala Mbofana <a href="mailto:mariamoabdala@yahoo.com.br">mariamoabdala@yahoo.com.br</a> |
| Benin           | Wilfrid Batcho <a href="mailto:wbatcho@yahoo.fr">wbatcho@yahoo.fr</a>                                   |
| Vanuatu         | Fasihah Taleo <a href="mailto:taleof@who.int">taleof@who.int</a>                                        |
